RESEARCH ARTICLE

# Noise propagation in an integrated model of bacterial gene expression and growth

Istvan T. Kleijn<sup>1</sup>, Laurens H. J. Kraaijeveld<sup>2</sup>, Rutger Hermsen<sup>1\*</sup>

Theoretical Biology, Department of Biology, Utrecht University, Utrecht, The Netherlands

<sup>1</sup> These authors contributed equally to this work.

<sup>2</sup> Current address: Biomathematics, Department of Mathematics, Imperial College London, London, United Kingdom

\* [r.hermsen@uu.nl](mailto:r.hermsen@uu.nl)

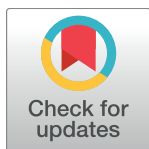

**OPEN ACCESS**

**Citation:** Kleijn IT, Kraaijeveld LHJ, Hermsen R (2018) Noise propagation in an integrated model of bacterial gene expression and growth. *PLoS Comput Biol* 14(10): e1006386. <https://doi.org/10.1371/journal.pcbi.1006386>

**Editor:** Alexandre V. Morozov, Rutgers University, UNITED STATES

**Received:** January 30, 2018

**Accepted:** July 20, 2018

**Published:** October 5, 2018

**Copyright:** © 2018 Kleijn et al. This is an open access article distributed under the terms of the [Creative Commons Attribution License](https://creativecommons.org/licenses/by/4.0/), which permits unrestricted use, distribution, and reproduction in any medium, provided the original author and source are credited.

**Data Availability Statement:** The expression data of Taniguchi *et al* [51] and Arike *et al* [53], used to parameterize the models of Fig 4 and S3 Fig., were published as supplementary datasets with the respective publications and can be accessed as such. The cross-correlation dataset of Kiviet *et al* [5], replotted in the top panels of Fig 4D–4F and S3 Fig. B–D, is available upon request from the corresponding author of that article ([tans@amolf.nl](mailto:tans@amolf.nl)).

**Funding:** LHJK was supported by the NWO (Nederlandse Organisatie voor Wetenschappelijk

## Abstract

In bacterial cells, gene expression, metabolism, and growth are highly interdependent and tightly coordinated. As a result, stochastic fluctuations in expression levels and instantaneous growth rate show intricate cross-correlations. These correlations are shaped by feedback loops, trade-offs and constraints acting at the cellular level; therefore a quantitative understanding requires an integrated approach. To that end, we here present a mathematical model describing a cell that contains multiple proteins that are each expressed stochastically and jointly limit the growth rate. Conversely, metabolism and growth affect protein synthesis and dilution. Thus, expression noise originating in one gene propagates to metabolism, growth, and the expression of all other genes. Nevertheless, under a small-noise approximation many statistical quantities can be calculated analytically. We identify several routes of noise propagation, illustrate their origins and scaling, and establish important connections between noise propagation and the field of metabolic control analysis. We then present a many-protein model containing >1000 proteins parameterized by previously measured abundance data and demonstrate that the predicted cross-correlations between gene expression and growth rate are in broad agreement with published measurements.

## Author summary

Small as they are, bacterial cells are influenced by random fluctuations in their macromolecular copy numbers. Single-cell experiments have shown a complex interplay between this compositional “noise” and fluctuations in the cellular growth rate. While it is clear that this interplay originates from the tight interdependence of gene expression, metabolism, and growth, the underlying mechanisms are poorly understood. In this paper, we present a mathematical framework that describes compositional noise reverberating through the cell. We identify multiple routes by which noise in the expression of individual genes can propagate through the cell and demonstrate which factors affect each route. In doing so, we establish fundamental connections between the field of metabolic control analysis and the transmission of gene-expression noise. We then present a model tailored to *Escherichia coli* that includes >1000 genes with expression parameters set by previously

Onderzoek, [www.nwo.nl](http://www.nwo.nl) (Grant 022.005.023). The funders had no role in study design, data collection and analysis, decision to publish, or preparation of the manuscript.

**Competing interests:** The authors have declared that no competing interests exist.

measured protein abundances and show that it can reproduce the main features of measured cross-correlation functions between gene expression levels and growth rate.

## Introduction

Few processes are more fundamental to life than the growth and proliferation of cells. Bacterial cells in particular are highly adapted to grow rapidly and reliably in diverse habitats [1]. Yet, the composition of individual bacteria grown in a constant environment is known to fluctuate vigorously, in part due to the stochastic nature of gene expression [2–5]. Many experimental and theoretical studies have shed light on the origins, characteristics and consequences of this “noisy” expression [2–17]. Still, it remains unknown to what extent, and by what routes, noise in gene expression propagates through the cell and affects the rate of growth [5, 18, 19], which is often considered a proxy for its fitness [18, 20].

Recently, important progress towards understanding noise propagation in single cells has been made through experiments in which the instantaneous growth of individual *Escherichia coli* cells was monitored in real time under fixed growth conditions [5, 21]. Such experiments have revealed large fluctuations in the growth rate, with coefficients of variation of the order of 25%, which in part result from noise in the concentrations of metabolic enzymes [5]. Conversely, growth-rate fluctuations affect the concentrations of individual enzymes, because the cell’s constituents are diluted whenever the cell grows [22]. Such results emphasize that a clear understanding of these processes is complicated by the fact that gene expression, metabolism, and growth are highly interdependent, involving multiple layers of feedback and cellular constraints.

This interdependence is also central to a series of recent studies that characterize the *average* composition and growth rate of *Escherichia coli* cultures in balanced exponential growth under variation of the growth medium [23–29]. In particular, these experiments have revealed striking linear relations between their mean proteomic composition and their mean growth rate [26–31]. Phenomenological models have demonstrated how such “growth laws” can be understood as near-optimal solutions to constrained allocation problems [20, 32–34]. These results also stress that global physiological variables and constraints strongly affect the expression of individual genes. As such, both these experiments and the single-cell experiments mentioned above suggest a “holistic” perspective: the behavior of individual components cannot be understood without some knowledge of the cell’s global physiological state [35, 36].

Here, we present a model of bacterial cells growing under fixed external growth conditions, in which gene expression, metabolism and growth are fully integrated. We offer a highly simplified description that nevertheless imposes several essential global cellular constraints. Both gene expression and growth rate fluctuate due to the stochastic synthesis of many protein species that together control the rates of metabolism and growth. Conversely, the rate of metabolism constrains the protein synthesis rates and the growth rate sets the dilution rate of all proteins. As a result, noise in the expression of each gene propagates and affects the expression of every other gene as well as the growth rate—and *vice versa*.

Below, we first introduce the generic modeling framework and its assumptions. We then make an excursion to the theory of growth control, in order to define growth-control coefficients and establish connections between the propagation of noise and the field of Metabolic Control Analysis. Next, we discuss how the concentration of each protein is affected by the synthesis noise in all other proteins; this exposes a hidden assumption in a standard operational definition of intrinsic and extrinsic expression noise. We subsequently explain the noise

modes that characterize the noise propagation between gene expression and growth in the context of a toy model with just two proteins. Lastly, we present a many-protein model that includes 1021 protein species with experimentally measured parameters. We demonstrate that the cross-correlations functions between expression and growth rate predicted by this model capture the main features of published measurements.

## Results

### Modeling framework

We here discuss the key assumptions of the modeling framework (Fig 1); see S1 Text, pp. 1–6 for details. We consider a culture of bacterial cells that has reached steady-state exponential growth under fixed external growth conditions. We study fluctuations of gene expression within individual cells in this steady state, and in particular how these fluctuations reverberate through the growing cell. Similar assumptions connecting the increase in biomass, the cellular growth rate, protein synthesis, and growth-mediated dilution were explored in a recent review article [37].

The mass density of *E. coli* cells is dominated by protein content [38] and under tight homeostatic control [39]. We assume that this homeostasis also eliminates long-lived protein-density fluctuations in single cells. Then, the volume of a cell is proportional to its protein mass  $M := \sum_i n_i$ , where  $n_i$  is the abundance (copy number) of protein  $i$ . (We ignore that different proteins have different molecular weights.) The instantaneous growth rate is then defined by  $\mu := \dot{M}/M$ , and the proteome fraction  $\phi_i := n_i/M$  of enzyme  $i$  measures its concentration. Differentiation of  $\phi_i$  with respect to time then yields

$$\dot{\phi}_i = \pi_i - \mu\phi_i, \tag{1}$$

where  $\pi_i$  is the synthesis rate per protein mass. (Here we neglect active protein degradation, which on average amounts to about 2% of the dilution rate [40].) By definition, proteome fractions obey the constraint  $\sum_i \phi_i = 1$ . Combined with Eq (1) this results in

$$\mu = \sum_i \pi_i. \tag{2}$$

That is, the growth rate equals the total rate of protein synthesis.

Another key assumption of our model is that the cellular growth rate is an *intensive* quantity. That is: given fixed mass fractions, the growth rate does not depend on the cell size, as suggested by the observation that individual *E. coli* cells grow approximately exponentially within their cell cycle [5, 41]. Based on this, we express the synthesis rate of protein  $i$  as:

$$\pi_i = f_i \mu_d(\phi) + N_i, \tag{3}$$

in which

$$\mu_d(\phi) := J/M. \tag{4}$$

The first term in Eq (3) is an intensive function; it captures the deterministic effect of the cellular composition  $\phi = (\phi_1, \phi_2, \dots)$  on the metabolic flux  $J$  that quantifies the rate of biomass production, normalized by the protein mass  $M$ . (Note that, here and below, we use the term metabolism in a broad sense; it is intended to encompass all catabolic and anabolic processes required for biomass production and cell growth, including protein synthesis.) The coefficients  $f_i$  specify which fraction of this flux is allocated towards the synthesis of protein species  $i$ . Because the  $f_i$  are fractions,  $\sum_i f_i = 1$ .

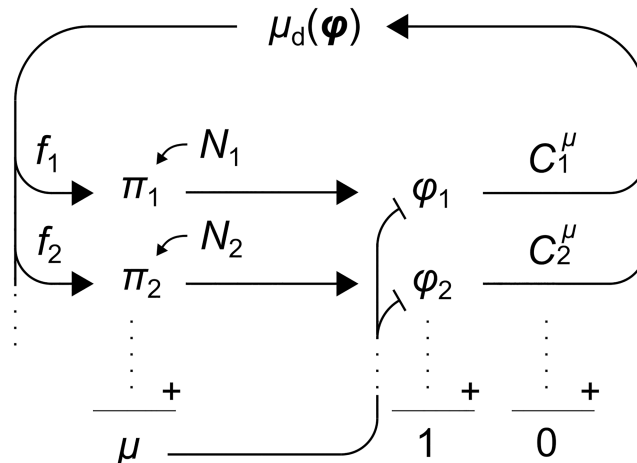

**Fig 1. Integrated model of stochastic gene expression and cell growth.** The cell contains many protein species, with proteome mass fractions  $\phi_i$  that sum to 1. Mass fractions are increased by protein synthesis but diluted by growth. The synthesis rate  $\pi_i$  of each species  $i$  is modulated by a noise source  $N_i$ . The instantaneous growth rate  $\mu$  reflects the total rate of protein synthesis. Proteins affect metabolism and thus the deterministic growth rate  $\mu_d(\phi)$ , as quantified by growth-control coefficients  $C_i^\mu$ . A fraction  $f_i$  of the total metabolic flux is allotted to the synthesis of protein  $i$ . The inherent noise in the expression of each gene reverberates through the cell, affecting cell growth and the expression of every other gene.

<https://doi.org/10.1371/journal.pcbi.1006386.g001>

The second term of Eq (3) couples each synthesis rate  $\pi_i$  to a zero-mean Ornstein–Uhlenbeck noise source  $N_i$  that represents the stochasticity of both transcription and translation [42]. Each noise source is characterized by an amplitude  $\theta_i$  and a rate of reversion to the mean  $\beta_i$ ; the latter’s inverse  $\beta_i^{-1}$  characterizes the time scale of intrinsic fluctuations in  $\pi_i$ . The variance of  $N_i$  is given by  $\text{Var}(N_i) = \theta_i^2 / (2\beta_i)$ . All noise sources are mutually independent, and we neglect other sources of noise, such as the unequal distribution of molecules over daughter cells during cell division (see Discussion).

Combining Eqs (2) and (3) reveals that

$$\mu = \mu_d(\phi) + \sum_i N_i, \quad (5)$$

which identifies  $\mu_d(\phi)$  as the growth rate afforded by a given proteome composition  $\phi$  in the zero-noise limit. Given a function  $\mu_d(\phi)$ , Eqs (1)–(3) fully define the dynamics of the cell.

Below, we focus on the simplest case where, under given environmental conditions, the allocation coefficients  $f_i$  are constant. This means that the cell does not dynamically adjust its allocation in response to fluctuations in expression levels. We note, however, that such dynamical effects of gene regulation could be included by allowing the  $f_i$  to depend on intra- and extra-cellular conditions, and in particular on the cellular composition  $\phi$ . (See S1 Text, p. 4.) We also stress that the allocation coefficients may differ strongly between growth conditions, as demonstrated by the growth laws mentioned above. For example, the  $f_i$ ’s of ribosomal proteins must be considerably larger in media that support a fast growth rate than in media with strong nutrient limitation, because the mean mass fraction of ribosomal proteins increases with the growth rate [30]. Here, however, we describe stochastic cell growth under fixed environmental conditions, so that the (mean) allocation of resources is well-defined and knowable in principle—for example through proteomics data.

Fig 1 is an illustration of the modeling framework. Noise in the synthesis of a protein species induces fluctuations in its mass fraction (Eq (1)). Through their effect on metabolism,

these fluctuations propagate to the deterministic growth rate  $\mu_d$ , which modulates the synthesis of all protein species (Eq (3)). In parallel, all noise sources directly impact the growth rate  $\mu$  (Eq (5)) and thus the dilution of all proteins (Eq (1)).

**Linearization under a small-noise approximation.** The results below rely on the assumption that Eqs (1)–(5) may be linearized around the time-averaged composition  $\phi_0$ . This transforms Eq (5) to

$$\frac{\delta\mu}{\mu_0} = \sum_i C_i^u \frac{\delta\phi_i}{\phi_{0,i}} + \sum_i \frac{N_i}{\mu_0}, \tag{6}$$

where  $\delta\phi_i$  is the deviation of  $\phi_i$  from its time average  $\phi_{0,i}$  and  $\delta\mu$  the deviation of  $\mu$  from  $\mu_0 := \mu_d(\phi_0)$ . (See S1 Text, p. 3 for derivations.) The coefficients  $C_i^u$  are defined as

$$C_i^u := \left[ \begin{array}{c} \phi_i \partial\mu_d \\ \mu_d \partial\phi_i \end{array} \right]_{\phi_0}. \tag{7}$$

In the terminology of linear noise models, the  $C_i^u$  are transfer coefficients: they quantify to what extent fluctuations in  $\phi_i$  transmit to  $\mu_d$ . Eq (6) demonstrates that the growth rate is affected by all noise sources, both directly (second term on the right-hand side) and indirectly through fluctuations in the protein mass fractions.

### Transfer coefficients are growth-control coefficients

The transfer coefficients  $C_i^u$  are reminiscent of the logarithmic gains defined in biochemical systems theory, which relate enzyme abundances to the metabolic flux in a given pathway [43]. It has previously been shown that these gains are relevant in the context of noise propagation [44]. Here, however, we consider the growth rate of the cell rather than the flux through a distinct pathway. In this section, we connect the transfer coefficients  $C_i^u$  to the control of cellular growth and the field of Metabolic Control Analysis (MCA) [45, 46].

In MCA, flux-control coefficients (FCCs)  $C_i^f$  are defined that quantify to what extent an enzyme concentration  $\phi_i$  limits (controls) a metabolic flux  $J$  [45, 46]:

$$C_i^f := \left[ \frac{\phi_i \partial J}{J \partial \phi_i} \right]_{\phi_0}. \tag{8}$$

In direct analogy to this definition of FCCs, the transfer coefficients of Eq (7) can be interpreted as growth-control coefficients (GCCs) that quantify each enzyme’s control of the growth rate. From Eq (4) a direct link between FCCs and GCCs can be derived (see also [47], p. 7 of S1 Text, and S1 Fig):

$$C_i^u = C_i^f - \phi_i. \tag{9}$$

The GCCs are specified by the sensitivity of the growth rate  $\mu_d(\phi)$  to changes in the proteome composition  $\phi$ , evaluated in the steady-state mean,  $\phi_0$ . Both the mean composition  $\phi_0$  and the function  $\mu_d$  clearly differ between growth conditions; therefore, the GCCs depend on the growth conditions as well.

As mentioned, studies on the resource allocation of cells grown under different growth conditions have revealed striking empirical relations between the mean proteome composition and the mean cellular growth rate [26, 28–30]. Even though these growth laws describe relations between growth rate and composition, they should not be confused with  $\mu_d$ . The growth laws describe correlations between the mean composition and the mean growth rate under variation of the growth conditions, whereas  $\mu_d$  describes the deterministic effect of the

instantaneous composition on the instantaneous growth rate under a particular, fixed growth condition. There is no direct relation between the two. By extension, the growth laws do not directly translate into knowledge on the GCCs.

**Growth-control coefficients and their sum rule.** An important difference between metabolic flux and cellular growth rate lies in their behavior under a scaling of the system size. It is routinely assumed that metabolic fluxes scale linearly with the system size, meaning that an increase in the abundances of all enzymes by a factor  $\alpha$  increases the metabolic flux  $J$  by the same factor  $\alpha$ . That is, fluxes are *extensive* variables. Based on this assumption, a famous sum rule has been derived for FCCs [45, 46]:

$$\sum_i C_i^J = 1. \tag{10}$$

In contrast, we assumed the growth rate to be invariant under scaling of the system size, *i.e.*, that the growth rate is an *intensive* variable. (Indeed, as Eq (4) directly shows, if  $J$  is extensive,  $\mu_d$  must be intensive, and *vice versa*.) Under this assumption, GCCs obey a markedly different sum rule:

$$\sum_i C_i^\mu = 0. \tag{11}$$

This sum rules articulate a delicate trade-off: the excess of one protein implies the lack of another.

Both sum rules are special cases of Euler’s homogeneous function theorem. Specific derivations are presented in S1 Text on p. 7. In general, for an arbitrary function  $f$  with a scaling relation  $f(\alpha\phi) = \alpha^k f(\phi)$ , a sum rule can be derived by differentiating this equation with respect to  $\alpha$  and evaluating the result in  $\alpha = 1$ . The particular cases  $k = 1$  (for the flux  $J$ ), and  $k = 0$  (for the growth rate  $\mu_d$ ) lead to Eqs (10) and (11).

In theory, all expression levels could be regulated such that  $C_i^\mu = 0$  for all protein species  $i$ . In reality, however, many protein species do not have a function within metabolism or biomass growth. By definition, the metabolic flux  $J$  does not depend on the expression levels of these proteins; therefore, their FCCs are zero. The GCC of such a protein, with mass fraction  $\phi_h$ , then follows from Eq (9):

$$C_h^\mu = -\phi_h. \tag{12}$$

That is, the control of all non-metabolic enzymes on the growth rate is negative. The sum rule then implies that the sum of GCCs of all proteins that do contribute to biomass growth must be positive and equal to

$$\sum_{i \notin H} C_i^\mu = -\sum_{h \in H} C_h^\mu = \sum_{h \in H} \phi_h = \phi_H. \tag{13}$$

where  $H$  denotes the set of non-metabolic proteins. This goes to show that any system that bears the cost of producing non-metabolic proteins must contain other proteins that have positive growth control.

This conclusion has implications for the propagation of noise. We saw that the noise transfer coefficients appearing in the linear noise model are in fact GCCs. The analysis in the previous paragraph demonstrates that these GCCs cannot all vanish; it then follows that there must be linear-order noise transfer from protein levels to the growth rate in all cells that maintain non-metabolic proteins.

Non-metabolic proteins are common, both in wild-type cells and in engineered constructs. In wild-type *E. coli*, the expression level of proteins that do not contribute to biomass growth were estimated recently in a study that combined a genome-scale allocation model with

proteomics data sets [48]. Direct estimates of  $\phi_H$  ranged from 25% to 40%, depending on the precise growth conditions. Although not directly beneficial to the growth of the cell in constant environments, the non-contributing proteome fraction is thought to provide fitness benefits to cells that encounter frequent changes in growth conditions [48]. Furthermore, synthetic biologists commonly study systems with a large expression burden [49].

### Separating in- and extrinsic noise components

Within the above framework, many statistical properties can be calculated analytically [5, 42]. In particular, the noise level of the concentration of protein  $i$ , quantified by the coefficient of variation  $\eta_i$ , can be expressed as:

$$\eta_i^2 = \frac{(1 - \phi_{0,i})^2}{\phi_{0,i}^2} \frac{\text{Var}(N_i)}{\mu_0(\mu_0 + \beta_i)} + \sum_{j \neq i} \frac{\text{Var}(N_j)}{\mu_0(\mu_0 + \beta_j)}. \tag{14}$$

The derivation is provided in [S1 Text](#), pp. 4–6. [Eq \(14\)](#) shows that the coefficient of variation has two components: the first term results from the noise in the synthesis of the protein itself, the second from the noise in the synthesis of all other proteins. Each term is proportional to the variance of the corresponding noise source, but weighted by a factor that decreases with the mean growth rate  $\mu_0$  and the reversion rate  $\beta_j$  of that noise source. This analysis confirms that the inherent noise in the synthesis of one protein affects all other proteins.

A fundamental distinction is commonly made between intrinsic and extrinsic noise in gene expression [44]. Intrinsic noise results from the inherently stochastic behavior of the molecular machinery involved in gene expression; extrinsic noise from fluctuations in the intra- and extracellular environment of this machinery. In this sense, the two terms in [Eq \(14\)](#) can be identified as intrinsic and extrinsic contributions.

Complications arise, however, if the standard operational definition of these terms is applied [4, 6]. This definition considers two identical reporter constructs R and G expressed in the same cell ([Fig 2A](#)). Noise sources extrinsic to both reporters affect both reporters identically, inducing positively correlated fluctuations in the concentrations of the reporter proteins. Intrinsic noise sources instead produce independent fluctuations in each concentration. Extrinsic noise is therefore measured by the covariance between both expression levels; intrinsic noise by their expected squared difference. This operationalization, however, implicitly assumes that intrinsic noise does not propagate between the reporters. This assumption is violated in our model because the synthesis of reporter R directly contributes to the dilution of protein G ([Fig 2B](#)). Consequently, the covariance between the expression levels has two contributions:

$$\frac{\text{Cov}(\phi_R, \phi_G)}{\phi_{0,b}^2} = \underbrace{-\frac{2(1 - \phi_{0,b})}{\phi_{0,b}} \frac{\text{Var}(N_b)}{\mu_0(\mu_0 + \beta_b)}}_{\text{transmission between R and G}} + \underbrace{\sum_{j \neq R,G} \frac{\text{Var}(N_j)}{\mu_0(\mu_0 + \beta_j)}}_{\text{other sources}}, \tag{15}$$

where the label “b” indicates quantities that are by definition identical for both expression systems. The second term on the right-hand side is positive and stems from noise sources that affect both reporters identically. The first term, however, is negative; it reflects the transmission of noise between reporters R and G. It would be misleading to identify [Eq \(15\)](#) as the extrinsic component of the noise—it is not even guaranteed to be positive. We conclude that the operational definition is not suitable when noise propagates between arbitrary genes.

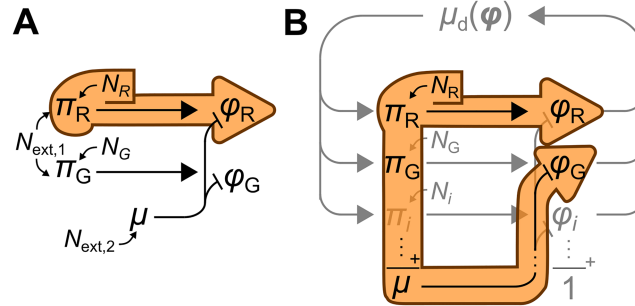

**Fig 2. Limitations of the operational definition of in- and extrinsic expression noise.** (A) Extrinsic noise is measured by the covariance between the expression levels of two identical reporter systems R and G. This presupposes that the intrinsic noise  $N_R$  of system R affects concentration  $\phi_R$  but not  $\phi_G$  (orange outline), so that the covariance between  $\phi_R$  and  $\phi_G$  quantifies the contribution of extrinsic sources  $N_{ext,i}$ . (B) But in our model,  $N_R$  affects the growth rate and thus the dilution of  $\phi_G$ . This adds a negative term to the covariance, which no longer measures just the extrinsic noise.

<https://doi.org/10.1371/journal.pcbi.1006386.g002>

### Expression–growth correlations in a two-protein toy model

The circulation of noise in the cell can be studied by measuring cross-correlations between expression and growth rate in single-cell experiments [5]. Interpreting measured cross-correlations, however, is non-trivial. To dissect them, we now discuss a toy version of the model with just two protein species, X and Y. Despite its simplicity, it displays many features seen in more realistic models.

Within the linear noise framework,  $\phi_Y-\mu$  and  $\pi_Y-\mu$  cross-correlations, respectively denoted  $R_{\phi_Y\mu}(\tau)$  and  $R_{\pi_Y\mu}(\tau)$ , can be calculated analytically [42]. Up to a normalization, the results can be written as:

$$R_{\phi_Y\mu}(\tau) \propto \underbrace{C_Y^\mu S_Y(\tau)}_{\text{Control}} + \underbrace{\phi_{0,Y} A_Y(\tau)}_{\text{Autogenic}} - \underbrace{\sum_{j=X,Y} \phi_{0,j} [C_j^\mu S_j(\tau) + \phi_{0,j} A_j(\tau)]}_{\text{Dilution}}; \tag{16}$$

$$R_{\pi_Y\mu}(\tau) \propto \underbrace{C_Y^\mu A_Y(-\tau)}_{\text{Control}} + \underbrace{\phi_{0,Y} B_Y(\tau)}_{\text{Autogenic}} + \underbrace{\sum_{j=X,Y} -C_j^\mu [C_j^\mu S_j(\tau) + \phi_{0,j} A_j(\tau)]}_{\text{Transmission}}. \tag{17}$$

(For a full derivation, not limited to the two-protein case, see S1 Text, pp. 5–6. The two-protein case is discussed further in S1 Text, pp. 8–9.) These equations are plotted in Fig 3A and 3B (see caption for parameters). As the equations show, the cross-correlation functions are linear combinations of three functions  $S_i(\tau)$ ,  $A_i(\tau)$ , and  $B_i(\tau)$ , which are also illustrated in the figure.

To aid interpretation, the cross-correlations can be decomposed into four noise modes, as indicated in Eqs (16) and (17).

The **control mode** (Fig 3C) reflects the control of enzyme Y on the growth rate. Noise  $N_Y$  in the synthesis of Y causes fluctuations in  $\phi_Y$ , which transfer to the growth rate in proportion with the GCC  $C_Y^\mu$ . Because the effect of  $\phi_Y$  on  $\mu$  is instantaneous, the contribution to the  $\phi_Y-\mu$  cross-correlation is proportional to the *symmetric* function  $S_Y(\tau)$ . In contrast, the effect of  $\pi_Y$  on  $\mu$  involves a delay; hence the contribution to the  $\pi_Y-\mu$  cross-correlation is proportional to the *asymmetric* function  $A_Y(\tau)$ . In both cases, the amplitude scales with  $C_Y^\mu$ .

The **autogenic mode** (Fig 3D) is a consequence of Eq (2). Because the growth rate matches the total rate of protein synthesis, noise in the synthesis of Y instantly affects the growth rate, resulting in a noise mode in the  $\pi_Y-\mu$  cross-correlation that is proportional to the symmetric



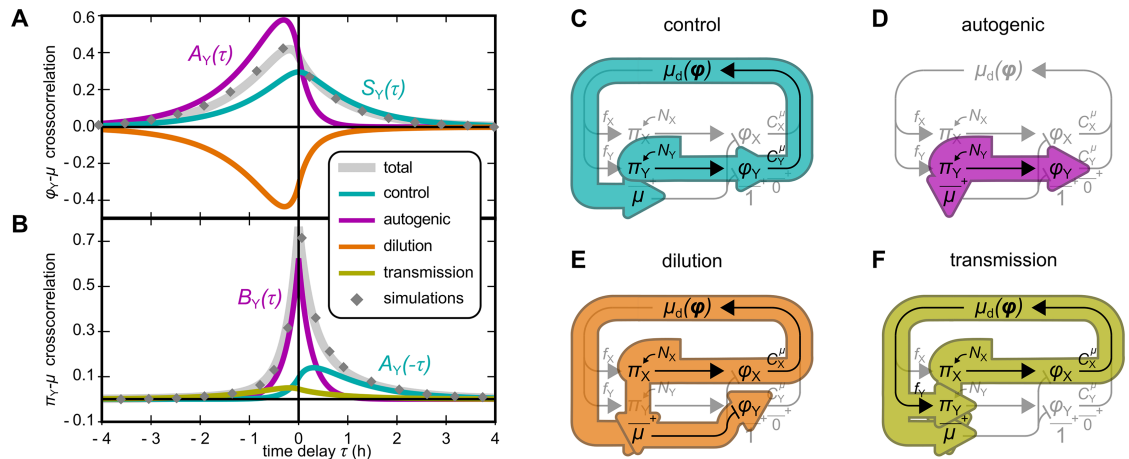

**Fig 3. Noise modes in a toy model containing only two protein species, X and Y.** (A) Analytical solution for the cross-correlation between protein Y's proteome fraction  $\phi_Y$  and growth rate  $\mu$  (gray curve), verified by simulations (gray diamonds, details in S1 Text, p. 9). The contributing noise modes are indicated (colored curves). (B) Same as (A), but for the synthesis rate  $\pi_Y$ . The cross-correlation functions are linear combinations of three classes of functions, called  $A_i(\tau)$ ,  $B_i(\tau)$ , and  $S_i(\tau)$  (see S1 Text, equations (47)–(49) for their definitions). In panels (A) and (B), noise modes that are proportional to just one of these functions are annotated accordingly. (C)–(F) Noise propagation routes underlying the noise modes. The control mode and the autogenic mode arise from noise source  $N_Y$  alone. Both noise sources  $N_X$  and  $N_Y$  contribute to the dilution and transmission modes, but only the contribution of  $N_X$  is illustrated in Fig (D) and (F). Parameters for (A) and (B):  $C_Y^d = 0.25$ ;  $\phi_{0,Y} = 0.33$ ; mean growth rate  $\mu_0 = 1 \text{ h}^{-1}$ ; noise sources of  $N_Y$  and  $N_X$  have amplitudes  $\theta_Y = 0.5$  and  $\theta_X = 0.5$  and reversion rates  $\beta_Y = \beta_X = 4\mu_0$ .

<https://doi.org/10.1371/journal.pcbi.1006386.g003>

function  $B_Y(\tau)$ . With a delay, this noise also affects  $\phi_Y$ , adding an asymmetric mode to the  $\phi_Y$ – $\mu$  cross-correlation. This mode does not depend on the control of Y; instead, its amplitude is proportional to the mean concentration  $\phi_{0,Y}$ .

The **dilution mode** (Fig 3E) pertains only to the  $\phi_Y$ – $\mu$  cross-correlation. It reflects that the growth rate of the cell is also the dilution rate of protein Y (Eq (1)). With a delay, upward fluctuations in  $\mu$  therefore cause downward fluctuations in  $\phi_Y$ . A subtle complication is that noise in the synthesis rate of both proteins reaches  $\mu$  via two routes: through the immediate effect of  $\pi_Y$  on  $\mu$ , and through the delayed effect of  $\pi_Y$  on  $\phi_Y$ , which in turn affects  $\mu$  in proportion with  $C_Y^d$  (see in Eq (6)). Together, these routes result in a mode towards which each protein contributes both a symmetric and an asymmetric function.

Lastly, the **transmission mode** (Fig 3F) is unique to the  $\pi_Y$ – $\mu$  cross-correlation. It reflects that all noise sources affect the cell's composition  $\phi$  and therefore  $\mu_d$ ; this in turn induces fluctuations in the synthesis rate  $\pi_Y$ . The noise sources again affect the growth rate via the two routes explained above, causing a symmetric and an asymmetric component to the  $\pi_Y$ – $\mu$  cross-correlation for each protein.

The above analysis shows that, even in a highly simplified linear model, the cross-correlations are superpositions of several non-trivial contributions. The intuitions gained from this exercise will be used below when we present the results of a more complex model.

**The effects of gene regulation.** Above, we assumed that the cell allocates a fixed fraction  $f_i$  of its metabolic flux towards the synthesis of protein  $i$ . Within this two-protein model all cross-correlations can still be computed if the  $f_i$  are linear(ized) functions of the concentrations  $\phi$  (see S1 Text, pp. 8–9, and S2 Fig). The resulting feedback regulation affects the decay of fluctuations: a negative feedback shortens the correlation time scales and reduces variance, whereas positive feedback lengthens them and increases variance (*cf.* [3, 10, 50]).

## Expression–growth correlations in a many-protein model

In single *E. coli* cells, the cross-correlations between gene expression and growth rate have been measured by Kiviet *et al.* [5]. To test whether the above framework can reproduce their results, we constructed a model that includes 1021 protein species with realistic parameters, based on an experimental data set [51].

In the experiments, micro-colonies of cells were grown on lactulose (a chemical analog of lactose) and expression of the *lac* operon was monitored using a green fluorescent protein (GFP) reporter inserted in the operon. Because intrinsic fluctuations in GFP expression affect the cross-correlations directly as well as indirectly, through their impact on the growth rate and the expression of other genes, we modeled this reporter construct explicitly (see Fig 4A, and S1 Text, pp. 9–11). Specifically, the *lac* operon O was represented as a collection of three proteins Y, Z, and G (for LacY, LacZ, and GFP) affected by a shared noise source  $N_O$  in addition to their private sources  $N_Y$ ,  $N_Z$ , and  $N_G$ . The GCC of the operon as a whole is the sum of the GCCs of its genes.

By varying the mean expression of the *lac* operon with a synthetic inducer, Kiviet *et al.* measured cross-correlations in three growth states with different macroscopic growth rates: “slow”, “intermediate”, and “fast” [5]. Empirically, the macroscopic growth rate obeyed a Monod law [52] as a function of the mean *lac* expression. We therefore mimicked the three growth states by choosing their mean *lac* expression levels and growth rates according to three points on a Monod curve that approximates the empirical one (Fig 4B, labels D, E, and F). Via Eq (7), the same curve also is used to estimate the GCC of the *lac* operon in each condition. Under “slow” growth conditions, the *lac* enzymes limit growth considerably (large GCC); under “fast” conditions, *lac* activity is almost saturated (small GCC).

To choose realistic parameter values for all other proteins, we used a published dataset of measured means and variances of *E. coli* protein abundances [51]. For each of the 1018 proteins in the dataset, the model included a protein with the exact same mean and variance (see Fig 4C). This uniquely fixed the amplitudes of all noise sources. The GCCs of all proteins were randomly sampled from a probability distribution that obeyed the sum rule of Eq (11). (See Materials and methods, and S1 Text, p. 10–11).

**Comparison with measured cross-correlations.** The experimental results on the cross-correlations between GFP synthesis  $\pi_G$ , GFP expression  $\phi_G$ , and growth rate  $\mu$  [5] are reproduced in Fig 4D–4F (top panels), together with the model predictions (middle and bottom panels).

The predicted cross-correlations are linear superpositions of the same noise modes as described for the two-protein model. However, the dilution and transmission modes are now driven by all 1022 noise sources, and there are two instances of the control and autogenic modes: one associated with the expression and GCC of the operon as a whole, and one with the expression and GCC of GFP separately. (See Equations (89)–(94) in S1 Text, p. 10.)

At slow growth, the  $\phi_G - \mu$  cross-correlation is almost symmetrical (Fig 4D, middle panel). Here the control mode of the operon dominates due to its large GCC. At higher growth rates, the autogenic modes become more prominent because their amplitudes are proportional to the expression level of the *lac* genes; at the same time, the amplitudes of the control modes decrease with the GCCs (Fig 4E and 4F, middle panels). As a result, the cross-correlation becomes weaker and more positively skewed.

At slow growth, the  $\pi_G - \mu$  cross-correlation is negatively skewed because the operon control mode is dominant (Fig 4D, bottom panel). It also shows a notable transmission mode. With increasing growth rate, the autogenic modes increase in importance, which narrows the peak, increases its height, and reduces its asymmetry (Fig 4E and 4F, bottom panels). The patterns

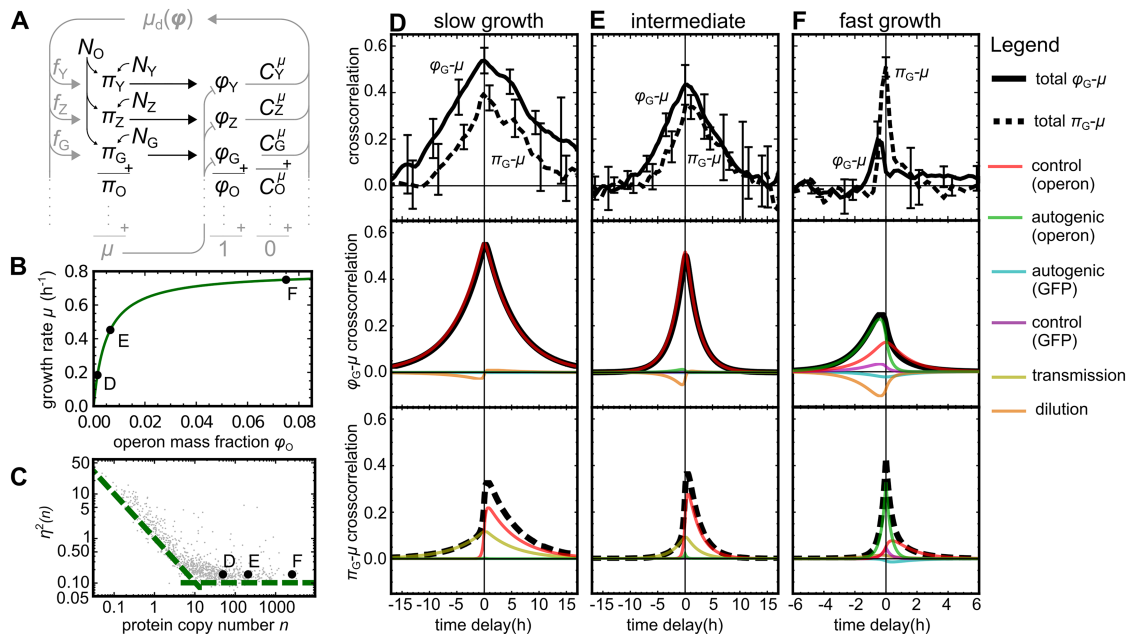

**Fig 4. Expression-growth cross-correlations in the many-protein model.** (A) Cartoon of the noise propagation network. (B) Monod curve describing the mean growth rate as a function of *lac* expression. Black dots indicate the operon mass fractions and growth rate used to calculate the cross-correlations in (D)-(F). (C) Noise distribution of the proteome (gray cloud) taken from Ref. [51], and the values chosen for proteins on the *lac* operon (black dots). Green dashed lines are guides for the eye. (D)-(F) Experimental [5] (top panels) and theoretical (middle and bottom panels) cross-correlations for three growth conditions. Proteome fraction-growth and production-growth cross-correlations are plotted as solid and dashed black lines, respectively. As in Fig 3A and 3B, colored lines show the contributing noise modes.

<https://doi.org/10.1371/journal.pcbi.1006386.g004>

seen in both cross-correlations are in good qualitative agreement with the experimental data (Fig 4D, 4E and 4F, top panels).

**Alternative dataset, similar results.** In the dataset that we used to parameterize protein expression, the abundances are consistently low compared with other studies [29, 53]. However, an alternative analysis based on different abundance data [53] and sampled variances [16] yielded similar results (S1 Text p. 11, and S3 Fig). We conclude that the qualitative trends are insensitive to the precise dataset used.

## Discussion

We have presented a model of stochastic cell growth in which the growth rate and the expression of all genes mutually affect each other. Systems in which all variables communicate to create interlocked feedback loops are generally hard to analyze. Analytical results were obtained by virtue of stark simplifying assumptions. Nevertheless, the predicted and measured cross-correlations have similar shapes and show similar trends under variation of the growth rate.

That said, a few differences are observed. Chiefly, at slow and intermediate growth rates the model consistently underestimates the decorrelation timescales (peak widths). In the model, the longest timescale is the doubling time; this timescale is exceeded in the experimental data. This suggests a positive feedback that is not included in the model, possibly as a result of gene regulation (also see S2 Fig), or else a noise source with a very long auto-correlation time.

Alongside their measurements, Kiviet *et al.* published their own linear noise model, which fits their data well. In fact, the shapes of the noise modes emerging in that model are mathematically identical to those presented above [42]. Yet, the models differ strongly in their setup

and interpretation. Kiviet *et al.* model a single enzyme E that is produced and diluted by growth. It features only three noise sources: one directly affects the production of E (“production noise”), one the growth rate  $\mu$  (“growth noise”), and one affects both simultaneously (“common noise”). While these ingredients are sufficient to fit the data, the interpretation and molecular origins of the common and growth noise are left unspecified. In our model, which includes many proteins, similar noise modes emerge without explicit growth or common noise sources. Each enzyme perceives fluctuations in the expression of *all* genes as noise in the growth rate; this results in a dilution mode similar to that of Kiviet *et al.* Furthermore, noise in the synthesis of each enzyme instantaneously affects the growth rate (Eq (2)) due to the assumed homeostatic control of protein density. Hence, this noise behaves as a common noise source, which explains why the autogenic mode is mathematically identical to the common-noise mode of Kiviet *et al.* We conclude that noise in the expression of many enzymes, combined with homeostatic control of protein density, can contribute to the observed but unexplained common- and growth-noise modes.

Control coefficients are routinely used in metabolic control analysis [45, 46, 54, 55] and have also been studied in the context of evolutionary optimization [47, 56]. In our linearized model, GCCs emerged as transfer coefficients, indicating that these quantities also affect the propagation of noise. Conversely, this suggests that GCCs could be inferred from noise-propagation measurements. For example, the Pearson correlation coefficient (cross-correlation at zero delay) between  $\phi_i$  and  $\mu$  might be used as an indication of control. However, we have seen in Fig 3 that the  $\phi_i$ - $\mu$  correlation involves several noise modes that are independent of the GCC. As a result, the signs of the Pearson correlation and the GCC do not necessarily agree (see Fig 5A). In addition, the intrinsic noise and GCC of the reporter protein can result in a negative cross-correlation even if the operon’s control is positive (Fig 5B). Alternatively, the asymmetry of the control mode in the  $\pi_i$ - $\mu$  cross-correlation could perhaps be exploited [5] (S4 Fig). Unfortunately, this asymmetry is also affected by other modes, such as the transmission mode, which can mask the effect (S4 Fig, panel C). We conclude that, in any case, such results have to be interpreted with great caution, ideally guided by a quantitative model.

Future theoretical work should aim to relax assumptions and remove limitations. The assumed strict control of protein density can be relaxed by allowing density fluctuations. If these are long-lived, they will likely weaken the autogenic mode and introduce new modes of their own. Also, additional noise sources can be included that do not stem directly from protein synthesis. In particular, we ignored noise originating from cell division despite its importance [8, 57, 58]. In addition, gene regulation will affect some noise modes; this can be studied by allowing the  $f_i$  to depend on  $\phi$ . It will also be interesting to include non-protein components of the cell, such as RNAs.

A further caveat is that the linear approximation used here is only reasonable if the noise is sufficiently weak. In fact, in the presence of strong non-linearities, the approach may even break down completely. For instance, it has been shown that cellular growth can be stochastically arrested when an enzyme whose product is toxic to the cell is expressed close to a threshold beyond which toxic metabolites build up to lethal doses [59]. In such circumstances, expression level noise in those enzymes can have a highly nonlinear effect on the cellular growth rate, resulting in subpopulations of growth-arrested cells [59]. That said, under more ordinary conditions linear models that describe noise in cellular networks have previously been used to great success [5, 42].

Throughout this document we have considered noise sources that act on each production rate independently. Alternatively, one could hypothesize that the observed fluctuations in protein concentrations might instead originate from noise in the allocation of the flux—that is, from fluctuations in the allocation coefficients  $f_i$ . This would be expected under the

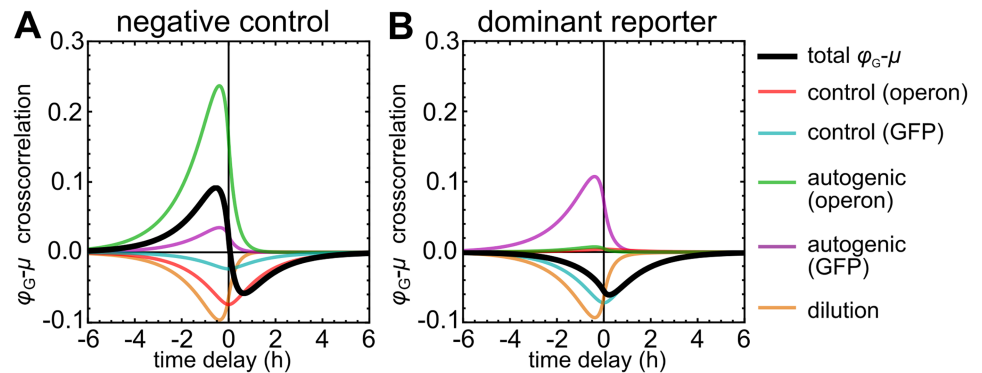

**Fig 5. Deceptive concentration-growth cross-correlations.** (A) Positive Pearson correlation despite a negative operon GCC, due to a dominant autogenic mode. Same parameters as Fig 4F, but with  $C_0^o = -0.035$ . (B) Negative Pearson correlation despite a positive operon GCC, due to noisy GFP expression. Same parameters as Fig 4F, but with operon noise much smaller than GFP noise (see Materials and methods).

<https://doi.org/10.1371/journal.pcbi.1006386.g005>

supposition that ribosomes are always fully occupied and translating at a constant, maximal rate, so that the relative rates of protein synthesis are determined solely by competition between different mRNAs based on their relative abundances and their translation initiation rates. Protein synthesis rates then become intrinsically correlated: an increase in the synthesis rate of one protein requires an simultaneous decrease in the synthesis rates of other proteins. In future work, such alternative models could be explored in detail. Preliminary simulations, however, show a striking symmetry in the  $\phi_i-\mu$  cross-correlation and a consistent asymmetry in the  $\pi_i-\mu$  cross-correlation (for details see S1 Text pp. 12–13, and S5 Fig). This can be understood as follows. If an increase in a particular synthesis rate is always compensated by a decrease in other production rates, the noise does not affect the sum of all production rates nor the growth rate instantaneously. Therefore, no autogenic mode should be present. Notably, in our model it is the autogenic mode that explains the asymmetry in the measured  $\phi_i-\mu$  cross-correlations as well as the dominant symmetric mode in the  $\pi_i-\mu$  cross-correlations under the fast growth condition. We conclude that noise on flux allocation alone cannot readily explain these experimental findings and additional noise sources would have to be included, such as the common noise as defined by Kiviet *et al.* [5].

Lastly, we hope that this work will inspire new experiments that can confirm or falsify the assumptions and results presented above. In particular, single-cell measurements of mass-density of protein-density fluctuations [60, 61] could establish whether our assumption of density homeostasis is warranted. Also, additional single-cell measurements could determine whether expression noise indeed propagates between reporter proteins, adding to their covariance, and whether the amplitude of the various noise modes scales with the GCCs and mass fractions as predicted.

## Materials and methods

We here specify the parameters used for the many-protein model; also see S1 Text, pp. 10–11.

### Growth rates and protein abundances

The Monod curve (Fig 4B) is given by  $\mu_0 = \mu_{\max} \phi_{0,O} / (\phi_{\text{half}} + \phi_{0,O})$ , with  $\mu_0$  the mean growth rate,  $\phi_{0,O}$  the mass fraction of the *lac*-operon proteins,  $\mu_{\max} = 0.8 \text{ h}^{-1}$ , and  $\phi_{\text{half}} = 0.005$ . The three growth states correspond to three points on this curve, with  $\phi_{0,O} / \phi_{\text{half}} = \{0.3, 1.3, 15\}$ ; this

mass is shared equally among proteins Y, Z, and G. The mass fractions of the remaining proteins matched the proportions of the dataset [51].

### Ornstein–Uhlenbeck noise sources

The amplitudes of all noise sources were uniquely fixed by the constraints that (i) the CV of each Lac protein was 0.15, (ii) the amplitude of  $N_O$  was 1.5 times that of  $N_G$  [4], and (iii) all other CVs agreed with the dataset [51]. All noise reversion rates were set to  $\beta = 4\mu_{\max}$ .

### GCCs

To select the GCCs, we first randomly assigned proteins ( $\approx 25\%$  of the total mass) to the non-metabolic sector H. After the *lac* reporter construct was added, the GCC of each protein  $h \in H$  was set by Eq (12). In each growth state, the GCC of the *lac* operon was calculated from the Monod curve, which yielded  $C_O^\mu = \{0.77, 0.43, 0.063\}$ . Assuming GFP is non-metabolic and the GCCs of Y and Z are equal, we set  $C_G^\mu = -\phi_{O,G}$  and  $C_Y^\mu = C_Z^\mu = (C_O^\mu - C_G^\mu)/2$ . The GCCs of all other proteins were sampled from a probability distribution that respects Eq (11) and assumes that proteins with a larger abundance tend to have a larger GCC (see S1 Text, p. 11).

## Supporting information

**S1 Text. Details of derivations and analyses.** Presented in this text are a full derivation of the linear noise model, calculations of statistical properties using Fourier transforms, complete derivations of the results on growth control, detailed calculations of the two-protein and many-protein models, and an analysis of a model where noise is added to ribosomal allocation rather than protein production.

(PDF)

**S1 Fig. Illustration of Eq (9).** Pictured is the relation between flux-control coefficients  $C_i^f$ , growth-control coefficients  $C_i^\mu$ , and proteomic mass fractions  $\phi_i$  for a cell containing just three protein species T, R, and H. Proteins H do not contribute to the global metabolic flux, so that  $C_H^f = 0$ . Purple arrows indicates the effect of a reduction in  $\phi_T$  in favor of  $\phi_R$ , which increases the growth control possessed by T.

(PDF)

**S2 Fig. The effects of regulation on noise parameters in the two-protein model.** (A) Cross-correlations between the expression level  $\phi_Y$  of protein Y and growth rate  $\mu$  in the two-protein model, for varying levels of positive (green) and negative (red) auto-regulation, as quantified by the regulatory control coefficient  $C_Y^{f_Y}$ . The curve plotted in gray is based on  $C_Y^{f_Y} = 0$  (no auto-regulation), and all other parameters are chosen as in Fig 3A; therefore the gray curve corresponds to the gray curve of Fig 3A. (B) Analytical solution of the coefficient of variation of the concentration of protein Y in the two-protein model, under varying levels of auto-regulation. The intrinsic and extrinsic noise components are indicated by the two shades of gray. The colored circles indicate the parameter choices belonging to the corresponding curves of panel A.

(PDF)

**S3 Fig. Expression–growth cross-correlations in a many-protein model based on sampled variances.** Analysis of the model with protein abundances taken from Arike *et al.* [53], and variances sampled from a phenomenological noise model (see [16] and S1 Text, Eq. (100) on p. 11). This figure is equivalent to Fig 4, except that it is based on different protein abundances and variances. (A) Distribution of protein abundances and variances. Each gray dot

represents a protein; the black points indicate the abundance and variance of the GFP reporter under the three growth condition (equivalent to Fig 4C). (B)–(D) Growth rate cross-correlations between GFP concentration and growth rate (top panels) and GFP synthesis rate and growth rate (bottom panels), for the three growth conditions (equivalent to Fig 4D, 4E and 4F).

(PDF)

**S4 Fig. Production–growth cross-correlations corresponding to Fig 5.** This figure shows the cross-correlations between GFP abundance and growth rate for the same parameters whose concentration–growth cross-correlations were studied in Fig 5. (A) The operon has a negative growth-control coefficient (cf. Fig 5A). (B) Fluctuations in GFP are dominated by its private noise source  $N_G$ , and are therefore largely decoupled from the fluctuations in the rest of the *lac* operon (cf. Fig 5B). (C) Highly symmetrical  $\pi_G$ – $\mu$  cross-correlation despite a (slightly) positive control of the operon, which is masked by the negative control carried by the reporter protein as well as by the asymmetrical transmission mode.

(PDF)

**S5 Fig. Comparison of noisy-allocation and noisy-production models.** (A) Simulations of an alternative model in which the noise sources act on the allocation of the flux rather than on each protein synthesis rate independently. Shown are the  $\phi_1$ – $\mu$  (solid line) and  $\pi_1$ – $\mu$  (dashed line) cross-correlations of protein 1 in a cell containing 40 protein species with arbitrary parameters (see S1 Text pp. 12–13 for more details about the simulation). Here,  $\phi_{0,1} = 0.027$  and  $C_1^{\mu} = 0.022$ . (B) Analytical results for the  $\phi_1$ – $\mu$  (solid line) and  $\pi_1$ – $\mu$  (dashed line) cross-correlations of the same cell, but where noise again acts on each protein synthesis rate independently. The amplitudes of the noise sources were adjusted such that the variances of all protein species were identical to those in panel (A). (C) The asymmetry of the  $\phi_1$ – $\mu$  cross-correlations  $R(\phi_1, \mu)(\tau)$  shown in panels A (solid line) and B (dashed line), quantified as  $R_{\phi_1, \mu}(-\tau) - R_{\phi_1, \mu}(\tau)$ . In order to estimate error bars, we repeated the “noisy allocation” simulation of the exact same cell 10 times; error bars indicate the standard error of the mean. Note that, for the “noisy allocation” model, zero lies within the narrow error bars, showing that the cross-correlation is highly symmetric and therefore shows no evidence for an asymmetric mode akin to the autogenic or common-noise mode.

(PDF)

## Acknowledgments

We thank Daan Kiviet and Philippe Nghe for sharing the cross-correlation data that was used to generate Fig 4D, 4E and 4F, top panels.

## Author Contributions

**Conceptualization:** Istvan T. Kleijn, Laurens H. J. Krah, Rutger Hermsen.

**Formal analysis:** Istvan T. Kleijn, Laurens H. J. Krah, Rutger Hermsen.

**Supervision:** Rutger Hermsen.

**Visualization:** Istvan T. Kleijn, Laurens H. J. Krah.

**Writing – original draft:** Istvan T. Kleijn, Rutger Hermsen.

**Writing – review & editing:** Istvan T. Kleijn, Laurens H. J. Krah, Rutger Hermsen.

## References

1. Ingraham JL, Maaløe O, Neidhardt FC. Growth of the Bacterial Cell. Sunderland MA: Sinauer Associates; 1983.
2. McAdams HH, Arkin A. Stochastic mechanisms in gene expression. *Proc Natl Acad Sci USA*. 1997; 94(3):814–819. <https://doi.org/10.1073/pnas.94.3.814> PMID: 9023339
3. Thattai M, van Oudenaarden A. Intrinsic noise in gene regulatory networks. *Proc Natl Acad Sci USA*. 2001; 98(15):8614–8619. <https://doi.org/10.1073/pnas.151588598> PMID: 11438714
4. Elowitz MB, Levine AJ, Siggia ED, Swain PS. Stochastic gene expression in a single cell. *Science*. 2002; 297(5584):1183–1186. <https://doi.org/10.1126/science.1070919> PMID: 12183631
5. Kiviet DJ, Nghe P, Walker N, Boulineau S, Sunderlikova V, Tans SJ. Stochasticity of metabolism and growth at the single-cell level. *Nature*. 2014; 514(7522):376–379. <https://doi.org/10.1038/nature13582> PMID: 25186725
6. Swain PS, Elowitz MB, Siggia ED. Intrinsic and extrinsic contributions to stochasticity in gene expression. *Proc Natl Acad Sci USA*. 2002; 99(20):12795–12800. <https://doi.org/10.1073/pnas.162041399> PMID: 12237400
7. Pedraza JM, van Oudenaarden A. Noise propagation in gene networks. *Science*. 2005; 307(5717):1965–1969. <https://doi.org/10.1126/science.1109090> PMID: 15790857
8. Rosenfeld N, Young JW, Alon U, Swain PS, Elowitz MB. Gene regulation at the single-cell level. *Science*. 2005; 307(5717):1962–1965. <https://doi.org/10.1126/science.1106914> PMID: 15790856
9. Cai L, Friedman N, Xie XS. Stochastic protein expression in individual cells at the single molecule level. *Nature*. 2006; 440(7082):358–362. <https://doi.org/10.1038/nature04599> PMID: 16541077
10. Friedman N, Cai L, Xie X. Linking stochastic dynamics to population distribution: An analytical framework of gene expression. *Phys Rev Lett*. 2006; 97(16):168302. <https://doi.org/10.1103/PhysRevLett.97.168302> PMID: 17155441
11. Yu J, Xiao J, Ren X, Lao K, Xie XS. Probing gene expression in live cells, one protein molecule at a time. *Science*. 2006; 311(5767):1600–1603. <https://doi.org/10.1126/science.1119623> PMID: 16543458
12. Levine E, Hwa T. Stochastic fluctuations in metabolic pathways. *Proc Natl Acad Sci USA*. 2007; 104(22):9224–9229. <https://doi.org/10.1073/pnas.0610987104> PMID: 17517669
13. Shahrezaei V, Swain PS. Analytical distributions for stochastic gene expression. *Proc Natl Acad Sci USA*. 2008; 105(45):17256–17261. <https://doi.org/10.1073/pnas.0803850105> PMID: 18988743
14. Bruggeman FJ, Blüthgen N, Westerhoff HV. Noise management by molecular networks. *PLoS Comput Biol*. 2009; 5(9):e1000506. <https://doi.org/10.1371/journal.pcbi.1000506> PMID: 19763166
15. Oyarzún DA, Lugagne JB, Stan GBV. Noise propagation in synthetic gene circuits for metabolic control. *ACS Synth Biol*. 2015; 4(2):116–125. <https://doi.org/10.1021/sb400126a> PMID: 24735052
16. Wolf L, Silander OK, van Nimwegen E. Expression noise facilitates the evolution of gene regulation. *eLife*. 2015; 4:e05856. <https://doi.org/10.7554/eLife.05856>
17. Thomas P, Terradot G, Danos V, Weisse A. Stochasticity of cellular growth: sources, propagation and consequences; 2018. Preprint. Available from: [bioRxiv:267658](https://arxiv.org/abs/267658).
18. Tănase-Nicola S, ten Wolde PR. Regulatory control and the costs and benefits of biochemical noise. *PLoS Comput Biol*. 2008; 4(4):e1000125. <https://doi.org/10.1371/journal.pcbi.1000125> PMID: 18716677
19. Hashimoto M, Nozoe T, Nakaoka H, Okura R, Akiyoshi S, Kaneko K, et al. Noise-driven growth rate gain in clonal cellular populations. *Proc Natl Acad Sci USA*. 2016; 113(12):3251–3256. <https://doi.org/10.1073/pnas.1519412113> PMID: 26951676
20. Bosdriesz E, Molenaar D, Teusink B, Bruggeman FJ. How fast-growing bacteria robustly tune their ribosome concentration to approximate growth-rate maximization. *FEBS J*. 2015; 282(10):2029–2044. <https://doi.org/10.1111/febs.13258> PMID: 25754869
21. Taheri-Araghi S, Brown SD, Sauls JT, McIntosh DB, Jun S. Single-cell physiology. *Annu Rev Biophys*. 2015; 44(1):123–142. <https://doi.org/10.1146/annurev-biophys-060414-034236> PMID: 25747591
22. Tsuru S, Ichinose J, Kashiwagi A, Ying BW, Kaneko K, Yomo T. Noisy cell growth rate leads to fluctuating protein concentration in bacteria. *Phys Biol*. 2009; 6(3):036015. <https://doi.org/10.1088/1478-3975/6/3/036015> PMID: 19567940
23. Maaloe O. An analysis of bacterial growth. *Dev Biol Suppl*. 1969; 3:33–58.
24. Tan C, Marguet P, You L. Emergent bistability by a growth-modulating positive feedback circuit. *Nat Chem Biol*. 2009; 5(11):842–848. <https://doi.org/10.1038/nchembio.218> PMID: 19801994
25. Klumpp S, Zhang Z, Hwa T. Growth rate-dependent global effects on gene expression in bacteria. *Cell*. 2009; 139(7):1366–1375. <https://doi.org/10.1016/j.cell.2009.12.001> PMID: 20064380



26. You C, Okano H, Hui S, Zhang Z, Kim M, Gunderson CW, et al. Coordination of bacterial proteome with metabolism by cyclic AMP signalling. *Nature*. 2013; 500(7462):301–306. <https://doi.org/10.1038/nature12446> PMID: 23925119
27. Klumpp S, Hwa T. Bacterial growth: global effects on gene expression, growth feedback and proteome partition. *Curr Opin Biotechnol*. 2014; 28:96–102. <https://doi.org/10.1016/j.copbio.2014.01.001> PMID: 24495512
28. Hui S, Silverman JM, Chen SS, Erickson DW, Basan M, Wang J, et al. Quantitative proteomic analysis reveals a simple strategy of global resource allocation in bacteria. *Mol Syst Biol*. 2015; 11(2):784. <https://doi.org/10.15252/msb.20145697> PMID: 25678603
29. Schmidt A, Kochanowski K, Vedelaar S, Ahrné E, Volkmer B, Callipo L, et al. The quantitative and condition-dependent *Escherichia coli* proteome. *Nat Biotechnol*. 2016; 34(1):104–110. <https://doi.org/10.1038/nbt.3418> PMID: 26641532
30. Scott M, Gunderson CW, Mateescu EM, Zhang Z, Hwa T. Interdependence of cell growth and gene expression: origins and consequences. *Science*. 2010; 330(6007):1099–1102. <https://doi.org/10.1126/science.1192588> PMID: 21097934
31. Hermsen R, Okano H, You C, Werner N, Hwa T. A growth-rate composition formula for the growth of *E. coli* on co-utilized carbon substrates. *Mol Syst Biol*. 2015; 11(4):801. <https://doi.org/10.15252/msb.20145537> PMID: 25862745
32. Molenaar D, van Berlo R, de Ridder D, Teusink B. Shifts in growth strategies reflect tradeoffs in cellular economics. *Mol Syst Biol*. 2009; 5(1):323. <https://doi.org/10.1038/msb.2009.82> PMID: 19888218
33. Scott M, Klumpp S, Mateescu EM, Hwa T. Emergence of robust growth laws from optimal regulation of ribosome synthesis. *Mol Syst Biol*. 2014; 10(8):747. <https://doi.org/10.15252/msb.20145379> PMID: 25149558
34. Maitra A, Dill KA. Bacterial growth laws reflect the evolutionary importance of energy efficiency. *Proc Natl Acad Sci USA*. 2015; 112(2):406–411. <https://doi.org/10.1073/pnas.1421138111> PMID: 25548180
35. Berthoumieux S, de Jong H, Baptist G, Pinel C, Ranquet C, Ropers D, et al. Shared control of gene expression in bacteria by transcription factors and global physiology of the cell. *Mol Syst Biol*. 2013; 9(1):634–634. <https://doi.org/10.1038/msb.2012.70> PMID: 23340840
36. Shahrezaei V, Marguerat S. Connecting growth with gene expression: of noise and numbers. *Curr Opin Microbiol*. 2015; 25:127–135. <https://doi.org/10.1016/j.mib.2015.05.012> PMID: 26093364
37. de Jong H, Casagrande S, Giordano N, Cinquemani E, Ropers D, Geiselmann J, et al. Mathematical modelling of microbes: metabolism, gene expression and growth. *J R Soc Interface*. 2017; 14(136):20170502. <https://doi.org/10.1098/rsif.2017.0502> PMID: 29187637
38. Bremer H, Dennis PP. Modulation of chemical composition and other parameters of the cell by growth rate. In: Neidhardt FC, Curtiss R III, Ingraham JL, Lin ECC, Low KB, Magasanik B, et al., editors. *Escherichia coli and Salmonella*. vol. 2. 2nd ed. Washington, D.C.: ASM Press; 1996. pp. 1553–1569.
39. Kubitschek HE, Baldwin WW, Schroeter SJ, Graetzer R. Independence of buoyant cell density and growth rate in *Escherichia coli*. *J Bacteriol*. 1984; 158(1):296–299. PMID: 6370960
40. Maurizi MR. Proteases and protein degradation in *Escherichia coli*. *Experientia*. 1992; 48(2):178–201. <https://doi.org/10.1007/BF01923511> PMID: 1740190
41. Iyer-Biswas S, Wright CS, Henry JT, Lo K, Burov S, Lin Y, et al. Scaling laws governing stochastic growth and division of single bacterial cells. *Proc Natl Acad Sci USA*. 2014; 111(45):15912–15917. <https://doi.org/10.1073/pnas.1403232111> PMID: 25349411
42. Dunlop MJ, Cox RS III, Levine JH, Murray RM, Elowitz MB. Regulatory activity revealed by dynamic correlations in gene expression noise. *Nat Genet*. 2008; 40(12):1493–1498. <https://doi.org/10.1038/ng.281> PMID: 19029898
43. Savageau MA. *Biochemical Systems Analysis*. Reading: Addison-Wesley; 1976.
44. Paulsson J. Summing up the noise in gene networks. *Nature*. 2004; 427(6973):415–418. <https://doi.org/10.1038/nature02257> PMID: 14749823
45. Kacser H, Burns JA, Fell DA. The control of flux. *Biochem Soc Trans*. 1995; 23(2):341–366. <https://doi.org/10.1042/bst0230341> PMID: 7672373
46. Heinrich R, Schuster S. *Metabolic Control Analysis*. In: *The Regulation of Cellular Systems*. New York, NY: Chapman & Hall; 1996. pp. 138–291.
47. Wortel MT, Bosdriesz E, Teusink B, Bruggeman FJ. Evolutionary pressures on microbial metabolic strategies in the chemostat. *Sci Rep*. 2016; 6:29503. <https://doi.org/10.1038/srep29503> PMID: 27381431
48. O'Brien EJ, Utrilla J, Palsson BO. Quantification and classification of *E. coli* proteome utilization and unused protein costs across environments. *PLoS Comput Biol*. 2016; 12(6):e1004998. <https://doi.org/10.1371/journal.pcbi.1004998> PMID: 27351952

49. Borkowski O, Ceroni F, Stan GB, Ellis T. Overloaded and stressed: whole-cell considerations for bacterial synthetic biology. *Curr Opin Microbiol.* 2016; 33(Supp C):123–130. <https://doi.org/10.1016/j.mib.2016.07.009> PMID: 27494248
50. Dublanche Y, Michalodimitrakis K, Kümmerer N, Foglierini M, Serrano L. Noise in transcription negative feedback loops: Simulation and experimental analysis. *Mol Syst Biol.* 2006; 2:41. <https://doi.org/10.1038/msb4100081> PMID: 16883354
51. Taniguchi Y, Choi PJ, Li GW, Chen H, Babu M, Hearn J, et al. Quantifying *E. coli* proteome and transcriptome with single-molecule sensitivity in single cells. *Science.* 2010; 329(5991):533–538. <https://doi.org/10.1126/science.1188308> PMID: 20671182
52. Monod J. The growth of bacterial cultures. *Annu Rev Microbiol.* 1949; 3(1):371–394. <https://doi.org/10.1146/annurev.mi.03.100149.002103>
53. Arike L, Valgepea K, Peil L, Nahku R, Adamberg K, Vilu R. Comparison and applications of label-free absolute proteome quantification methods on *Escherichia coli*. *J Proteomics.* 2012; 75(17):5437–5448. <https://doi.org/10.1016/j.jprot.2012.06.020> PMID: 22771841
54. Fell DA. Metabolic control analysis: a survey of its theoretical and experimental development. *Biochem J.* 1992; 286(Pt 2):313–330. <https://doi.org/10.1042/bj2860313> PMID: 1530563
55. Moreno-Sánchez R, Saavedra E, Rodríguez-Enríquez S, Olín-Sandoval V. Metabolic control analysis: a tool for designing strategies to manipulate metabolic pathways. *J Biomed Biotechnol.* 2008; 2008:597913. <https://doi.org/10.1155/2008/597913> PMID: 18629230
56. Berkhout J, Bosdriesz E, Nikerel E, Molenaar D, Ridder Dd, Teusink B, et al. How biochemical constraints of cellular growth shape evolutionary adaptations in metabolism. *Genetics.* 2013; 194(2):505–512. <https://doi.org/10.1534/genetics.113.150631> PMID: 23535382
57. Golding I, Paulsson J, Zawilski SM, Cox EC. Real-time kinetics of gene activity in individual bacteria. *Cell.* 2005; 123(6):1025–1036. <https://doi.org/10.1016/j.cell.2005.09.031> PMID: 16360033
58. Walker N, Nghe P, Tans SJ. Generation and filtering of gene expression noise by the bacterial cell cycle. *BMC Biol.* 2016; 14:11. <https://doi.org/10.1186/s12915-016-0231-z> PMID: 26867568
59. Ray JCJ, Wickersheim ML, Jalihal AP, Adeshina YO, Cooper TF, Balázs G. Cellular growth arrest and persistence from enzyme saturation. *PLoS Comput Biol.* 2016; 12(3):e1004825. <https://doi.org/10.1371/journal.pcbi.1004825> PMID: 27010473
60. Grover WH, Bryan AK, Diez-Silva M, Suresh S, Higgins JM, Manalis SR. Measuring single-cell density. *Proc Natl Acad Sci USA.* 2011; 108(27):10992–10996. <https://doi.org/10.1073/pnas.1104651108> PMID: 21690360
61. Martínez-Martín D, Fläschner G, Gaub B, Martin S, Newton R, Beerli C, et al. Inertial picobalance reveals fast mass fluctuations in mammalian cells. *Nature.* 2017; 550(7677):500–505. <https://doi.org/10.1038/nature24288> PMID: 29072271
